# Supplementary material for: Diagnostic Performance of Antigen Rapid Diagnostic Tests, Chest Computed Tomography, and Lung Point-of-Care-Ultrasonography for SARS-CoV-2 Compared with RT-PCR Testing: A Systematic Review and Network Meta-Analysis
Source: MDPI journal article supplement (doi:10.3390/diagnostics12061302), 2022-05-24
Supplement: s1 [file s1]

## Supplementary appendix

This supplemental material has been provided by the authors to give readers additional information about their work.

Supplement to: Shim SR, Kim SJ, Hong MH, Lee JH, Kang MG, Han HW. Diagnostic performance of antigen rapid diagnostic tests, chest computed tomography, and lung point-of-care-ultrasonography for SARS-CoV-2 compared with RT-PCR testing: A systematic review and network meta-analysis.

Figure S1. Quality Assessment of Diagnostic Accuracy Studies 2 (QUADAS-2) Study Quality Summary

Figure S2. Network meta-analysis forest plot and SROC between nasopharyngeal swab and other swab for RDT

Table S1. Characteristics of the included studies

Table S2. Search queries

Table S3. SUCRA Values of 3 Different methods for diagnosis of SARS-CoV-2 infection by PCR

**Table S1. Characteristics of the included studies**

| Study No. | First author<br>year_subgroup | Country     | Index test         |                | Reference standard |                | Specimen site<br>for RDT | Study<br>population |                                 |                    |
|-----------|-------------------------------|-------------|--------------------|----------------|--------------------|----------------|--------------------------|---------------------|---------------------------------|--------------------|
|           |                               |             | No. of<br>positive | Sample<br>size | No. of<br>positive | Sample<br>size |                          |                     |                                 |                    |
| 1         | Agullo 2021_NP                | Spain       | RDT                | 76             | 77                 | PCR            | 56                       | 575                 | Nasopharyngeal                  | Age unclear        |
|           | Agullo 2021_nasal             |             | RDT                | 59             | 59                 | PCR            | 73                       | 600                 | Nasal                           |                    |
|           | Agullo 2021_saliva            |             | RDT                | 28             | 28                 | PCR            | 93                       | 582                 | Saliva                          |                    |
| 2         | Ai 2020                       | China       | CT                 | 580            | 888                | PCR            | 21                       | 126                 | -                               | Adult              |
| 3         | Albert 2021                   | Spain       | RDT                | 43             | 43                 | PCR            | 11                       | 369                 | Nasopharyngeal                  | Adult and children |
| 4         | Alemaný 2020_NP               | Spain       | RDT                | 779            | 779                | PCR            | 55                       | 140                 | Nasopharyngeal                  | Adult and children |
|           | Alemaný 2020_nasal            |             | RDT                | 93             | 98                 | PCR            | 24                       | 389                 | Nasal                           | Adult and children |
| 5         | Asai 2021                     | Japan       | RDT                | 49             | 53                 | PCR            | 14                       | 252                 | Saliva                          | Age unclear        |
| 6         | Aslan 2020                    | Turkey      | CT                 | 226            | 246                | PCR            | 24                       | 60                  | -                               | Adult              |
| 7         | Barbosa 2020                  | Brazil      | CT                 | 23             | 48                 | PCR            | 2                        | 43                  | -                               | Adult              |
| 8         | Baro 2021_Panbio              | Spain       | RDT                | 39             | 40                 | PCR            | 62                       | 246                 | Nasopharyngeal                  | Age unclear        |
|           | Baro 2021_Clinitest           |             | RDT                | 52             | 55                 | PCR            | 49                       | 231                 |                                 |                    |
|           | Baro 2021_Standard Q          |             | RDT                | 44             | 51                 | PCR            | 57                       | 235                 |                                 |                    |
|           | Baro 2021_Lepu                |             | RDT                | 46             | 66                 | PCR            | 55                       | 220                 |                                 |                    |
|           | Baro 2021_Surescreen V        |             | RDT                | 29             | 33                 | PCR            | 72                       | 253                 |                                 |                    |
| 9         | Basso 2021                    | Italy       | RDT                | 71             | 80                 | PCR            | 16                       | 154                 | Nasopharyngeal                  | Adult              |
| 10        | Beck 2021                     | USA         | RDT                | 47             | 48                 | PCR            | 14                       | 298                 | Nasopharyngeal                  | Adult and children |
| 11        | Bellini 2020                  | Italy       | CT                 | 80             | 156                | PCR            | 62                       | 416                 | -                               | Adult and children |
| 12        | Berger 2021_Panbio            | Switzerland | RDT                | 106            | 106                | PCR            | 18                       | 429                 | Nasopharyngeal                  | Adult              |
|           | Berger 2021_Standard Q        |             | RDT                | 170            | 171                | PCR            | 21                       | 358                 |                                 |                    |
| 13        | Besutti 2020                  | Italy       | CT                 | 438            | 454                | PCR            | 158                      | 242                 | -                               | Adult              |
| 14        | Bianchi 2021                  | Italy       | US                 | 120            | 184                | PCR            | 20                       | 176                 | -                               | Age unclear        |
| 15        | Bosso 2020                    | Italy       | US                 | 19             | 22                 | PCR            | 7                        | 31                  | -                               | Age unclear        |
| 16        | Mboumba 2021                  | France      | RDT                | 90             | 90                 | PCR            | 10                       | 60                  | Nasopharyngeal                  | Age unclear        |
| 17        | Brenner 2021                  | USA         | US                 | 79             | 102                | PCR            | 13                       | 72                  | -                               | Age unclear        |
| 18        | Cartocci Gaia 2020            | Italy       | CT                 | 147            | 171                | PCR            | 15                       | 143                 | -                               | Adult              |
| 19        | Caruana 2021_Standard Q       | Switzerland | RDT                | 47             | 48                 | PCR            | 67                       | 484                 | Nasopharyngeal                  | Adult              |
|           | Caruana 2021_Panbio           |             | RDT                | 47             | 49                 | PCR            | 67                       | 483                 |                                 |                    |
|           | Caruana 2021_Exdia            |             | RDT                | 55             | 57                 | PCR            | 59                       | 475                 |                                 |                    |
|           | Caruana 2021_BD Veritor       |             | RDT                | 47             | 48                 | PCR            | 67                       | 484                 |                                 |                    |
| 20        | Caruso 2020                   | Italy       | CT                 | 60             | 102                | PCR            | 2                        | 56                  | -                               | Adult              |
| 21        | Cerutti 2020_ER               | Italy       | RDT                | 75             | 75                 | PCR            | 29                       | 110                 | Nasopharyngeal                  | Adult              |
|           | Cerutti 2020_travelers        |             | RDT                | 2              | 2                  | PCR            | 3                        | 143                 |                                 |                    |
| 22        | Chaimayo 2020                 | Thailand    | RDT                | 59             | 64                 | PCR            | 1                        | 390                 | Nasopharyngeal                  | Adult and children |
| 23        | Ciotti 2021                   | Italy       | RDT                | 12             | 12                 | PCR            | 27                       | 38                  | Nasopharyngeal                  | Adult and children |
| 24        | Colombi 2020                  | Italy       | US                 | 311            | 360                | PCR            | 29                       | 126                 | -                               | Adult              |
| 25        | Debray 2020                   | France      | CT                 | 120            | 124                | PCR            | 40                       | 117                 | -                               | Adult              |
| 26        | Dofferhoff 2020               | Netherlands | CT                 | 136            | 172                | PCR            | 18                       | 140                 | -                               | Adult              |
| 27        | Dominguez 2021                | Spain       | RDT                | 19             | 19                 | PCR            | 1                        | 11                  | Unclear                         | Adult              |
| 28        | Drain 2021_ANT                | UK/USA      | RDT                | 81             | 87                 | PCR            | 2                        | 170                 | Nasal                           | Adult and children |
|           | Drain 2021_NP                 |             | RDT                | 39             | 44                 | PCR            | 1                        | 211                 | Nasopharyngeal                  |                    |
| 29        | Ducray 2020                   | France      | CT                 | 259            | 308                | PCR            | 28                       | 386                 | -                               | Adult              |
| 30        | Falaschi 2020                 | Italy       | CT                 | 419            | 485                | PCR            | 43                       | 288                 | -                               | Adult              |
| 31        | Favresse 2021_Biotical        | Belgium     | RDT                | 64             | 65                 | PCR            | 32                       | 123                 | Nasopharyngeal                  | Adult and children |
|           | Favresse 2021_Panbio          |             | RDT                | 65             | 65                 | PCR            | 31                       | 123                 |                                 |                    |
|           | Favresse 2021_Healgen         |             | RDT                | 74             | 77                 | PCR            | 22                       | 111                 |                                 |                    |
|           | Favresse 2021_Roche           |             | RDT                | 67             | 67                 | PCR            | 29                       | 121                 |                                 |                    |
|           | Favresse 2021_VITROS          |             | RDT                | 80             | 80                 | PCR            | 16                       | 108                 |                                 |                    |
| 32        | Fenollar 2021                 | France      | RDT                | 154            | 161                | PCR            | 50                       | 180                 | Nasopharyngeal                  | Age unclear        |
| 33        | Ferguson 2021                 | UK          | RDT                | 2              | 2                  | PCR            | 6                        | 718                 | Nasal                           | Adult              |
| 34        | Fonsi 2020                    | Italy       | CT                 | 41             | 43                 | PCR            | 3                        | 20                  | 3-arm study of<br>CT, US by PCR | Adult              |
|           | Fonsi 2020                    |             | US                 | 30             | 34                 | PCR            | 3                        | 20                  |                                 |                    |
| 35        | Fujioka 2020                  | Japan       | CT                 | 57             | 67                 | PCR            | 19                       | 87                  | -                               | Adult              |
| 36        | Gezer 2020                    | Turkey      | CT                 | 92             | 97                 | PCR            | 6                        | 125                 | -                               | Adult              |
| 37        | Giannitto 2020                | Italy       | CT                 | 14             | 24                 | PCR            | 6                        | 44                  | -                               | Adult              |
| 38        | Gietema 2020                  | Netherlands | CT                 | 74             | 109                | PCR            | 9                        | 84                  | -                               | Adult              |

|    |                                                                                                                 |             |                                 |                            |                             |                                 |                            |                                |                                 |                       |
|----|-----------------------------------------------------------------------------------------------------------------|-------------|---------------------------------|----------------------------|-----------------------------|---------------------------------|----------------------------|--------------------------------|---------------------------------|-----------------------|
| 39 | Gili 2021_selected<br>Gili 2021_screening                                                                       | Italy       | RDT<br>RDT                      | 86<br>90                   | 97<br>220                   | PCR<br>PCR                      | 9<br>0                     | 129<br>1518                    | Nasopharyngeal                  | Age unclear           |
| 40 | Gremmels 2020_Utrecht<br>Gremmels 2020_Aruba                                                                    | Netherlands | RDT<br>RDT                      | 101<br>51                  | 101<br>51                   | PCR<br>PCR                      | 38<br>12                   | 1266<br>157                    | Nasopharyngeal                  | Adult                 |
| 41 | Guillo 2020                                                                                                     | France      | CT                              | 103                        | 114                         | PCR                             | 26                         | 100                            | -                               | Adult                 |
| 42 | Gupta 2020                                                                                                      | India       | RDT                             | 63                         | 64                          | PCR                             | 14                         | 266                            | Nasopharyngeal                  | Adult                 |
| 43 | Haak 2020<br>Haak 2020                                                                                          | Netherlands | US<br>CT                        | 23<br>2                    | 51<br>15                    | PCR<br>PCR                      | 1<br>1                     | 42<br>42                       | 3-arm study of<br>CT, US by PCR | Adult                 |
| 44 | He 2020                                                                                                         | China       | CT                              | 26                         | 28                          | PCR                             | 8                          | 54                             | -                               | Adult and<br>children |
| 45 | Hermans 2020                                                                                                    | Netherlands | CT                              | 120                        | 142                         | PCR                             | 13                         | 177                            | -                               | Adult                 |
| 46 | Hernigou 2020                                                                                                   | Belgium     | CT                              | 13                         | 15                          | PCR                             | 3                          | 32                             | -                               | Adult                 |
| 47 | Herpe 2021                                                                                                      | France      | CT                              | 1999                       | 2524                        | PCR                             | 250                        | 2300                           | -                               | Adult and<br>children |
| 48 | Hirotsu 2021                                                                                                    | Japan       | RDT                             | 37                         | 37                          | PCR                             | 3                          | 992                            | Nasopharyngeal                  | Age unclear           |
| 49 | Homza 2021_Ecotest<br>Homza 2021_Joysbio<br>Homza 2021_ND COVID<br>Homza 2021_Standard Q<br>Homza 2021_VIVADiag | Czech       | RDT<br>RDT<br>RDT<br>RDT<br>RDT | 81<br>52<br>54<br>26<br>38 | 88<br>54<br>104<br>27<br>45 | PCR<br>PCR<br>PCR<br>PCR<br>PCR | 26<br>38<br>23<br>16<br>53 | 230<br>171<br>87<br>112<br>223 | Nasopharyngeal                  | Adult                 |
| 50 | Houston 2021                                                                                                    | UK          | RDT                             | 242                        | 264                         | PCR                             | 38                         | 464                            | Nasopharyngeal                  | Adult                 |
| 51 | Igloi 2021                                                                                                      | Netherlands | RDT                             | 158                        | 162                         | PCR                             | 28                         | 808                            | Nasopharyngeal                  | Adult                 |
| 52 | Jaaskelainen 2021_Sofia<br>Jaaskelainen<br>2021_Standard Q<br>Jaaskelainen 2021_Panbio                          | Finland     | RDT<br>RDT<br>RDT               | 119<br>128<br>126          | 119<br>128<br>126           | PCR<br>PCR<br>PCR               | 29<br>30<br>26             | 69<br>70<br>64                 | Nasopharyngeal                  | Age unclear           |
| 53 | Jalil et al2020                                                                                                 | USA         | US                              | 31                         | 34                          | PCR                             | 5                          | 35                             | -                               | Age unclear           |
| 54 | James 2021                                                                                                      | USA         | RDT                             | 86                         | 89                          | PCR                             | 66                         | 2250                           | Nasal                           | Adult                 |
| 55 | Kannian 2021                                                                                                    | India       | RDT                             | 15                         | 15                          | PCR                             | 12                         | 22                             | Saliva                          | Age unclear           |
| 56 | Kilic 2021                                                                                                      | USA         | RDT                             | 77                         | 92                          | PCR                             | 39                         | 1292                           | Nasal                           | Adult and<br>children |
| 57 | Kohmer 2021_R-Biopharm<br>Kohmer 2021_Standard Q<br>Kohmer 2021_Nadal<br>Kohmer 2021_LumiraDx                   | Germany     | RDT<br>RDT<br>RDT<br>RDT        | 29<br>32<br>18<br>37       | 30<br>32<br>18<br>37        | PCR<br>PCR<br>PCR<br>PCR        | 45<br>42<br>56<br>37       | 70<br>68<br>82<br>63           | Nasopharyngeal                  | Age unclear           |
| 58 | Korevaar 2020                                                                                                   | Netherlands | CT                              | 117                        | 142                         | PCR                             | 9                          | 97                             | -                               | Adult                 |
| 59 | Krdzalic 2020                                                                                                   | Netherlands | CT                              | 25                         | 32                          | PCR                             | 3                          | 24                             | -                               | Adult                 |
| 60 | Kruttgen 2021                                                                                                   | Germany     | RDT                             | 53                         | 56                          | PCR                             | 22                         | 94                             | Nasopharyngeal                  | Age unclear           |
| 61 | Kuzan 2020                                                                                                      | Turkey      | CT                              | 48                         | 69                          | PCR                             | 21                         | 51                             | -                               | Adult                 |
| 62 | Lambert-Niclot 2020                                                                                             | France      | RDT                             | 47                         | 47                          | PCR                             | 47                         | 91                             | Nasopharyngeal                  | Age unclear           |
| 63 | Lefever 2021                                                                                                    | Belgium     | RDT                             | 138                        | 138                         | PCR                             | 66                         | 276                            | Nasopharyngeal                  | Adult and<br>children |
| 64 | Li 2020                                                                                                         | China       | CT                              | 42                         | 61                          | PCR                             | 1                          | 31                             | -                               | Adult                 |
| 65 | Lieveld 2020                                                                                                    | Netherlands | US                              | 79                         | 108                         | PCR                             | 7                          | 78                             | -                               | Age unclear           |
| 66 | Linares 2020                                                                                                    | Spain       | RDT                             | 44                         | 44                          | PCR                             | 16                         | 211                            | Nasopharyngeal                  | Adult                 |
| 67 | Lindner 2021_AN<br>Lindner 2021_NP                                                                              | Germany     | RDT<br>RDT                      | 29<br>31                   | 31<br>32                    | PCR<br>PCR                      | 10<br>8                    | 258<br>257                     | Nasal<br>Nasopharyngeal         | Adult                 |
| 68 | Liotti 2021                                                                                                     | Italy       | RDT                             | 49                         | 53                          | PCR                             | 55                         | 306                            | Nasopharyngeal                  |                       |
| 69 | Luo 2020a                                                                                                       | China       | CT                              | 26                         | 40                          | PCR                             | 4                          | 33                             | -                               | Adult and<br>children |
| 70 | Luo 2020b                                                                                                       | China       | CT                              | 70                         | 77                          | PCR                             | 8                          | 63                             | -                               | Adult                 |
| 71 | Mei 2020                                                                                                        | USA         | CT                              | 274                        | 313                         | PCR                             | 145                        | 592                            | -                               | Adult and<br>children |
| 72 | Merino 2021                                                                                                     | Spain       | RDT                             | 325                        | 332                         | PCR                             | 34                         | 626                            | Nasopharyngeal                  | Adult and<br>children |
| 73 | Mertens 2020                                                                                                    | Belgium     | RDT                             | 76                         | 77                          | PCR                             | 56                         | 251                            | Nasopharyngeal                  | Age unclear           |
| 74 | Miranda 2020                                                                                                    | Brazil      | CT                              | 30                         | 31                          | PCR                             | 6                          | 44                             | -                               | Adult and<br>children |
| 75 | Mockel 2021_adult<br>Mockel 2021_children                                                                       | Germany     | RDT<br>RDT                      | 67<br>18                   | 67<br>19                    | PCR<br>PCR                      | 22<br>7                    | 204<br>183                     | Nasopharyngeal                  | Adult<br>Children     |
| 76 | Nalumansi 2020                                                                                                  | Uganda      | RDT                             | 63                         | 76                          | PCR                             | 27                         | 186                            | Nasopharyngeal                  | Adult                 |
| 77 | Narinx 2020<br>Narinx 2020                                                                                      | Belgium     | US<br>CT                        | 14<br>12                   | 73<br>22                    | PCR<br>PCR                      | 3<br>3                     | 68<br>68                       | 3-arm study of<br>CT, US by PCR | Adult                 |
| 78 | Okoye 2021                                                                                                      | USA         | RDT                             | 24                         | 24                          | PCR                             | 21                         | 2614                           | Nasal                           | Adult and<br>children |
| 79 | Olearo 2020_Standard Q<br>Olearo 2020_Panbio<br>Olearo 2020_MEDsan<br>Olearo 2020_CLINITEST                     | Germany     | RDT<br>RDT<br>RDT<br>RDT        | 41<br>37<br>38<br>46       | 41<br>37<br>41<br>46        | PCR<br>PCR<br>PCR<br>PCR        | 43<br>47<br>46<br>38       | 143<br>147<br>143<br>138       | Oropharyngeal                   | Age unclear           |

|     |                                                                                               |                  |                          |                     |                     |                          |                     |                      |                                        |                    |
|-----|-----------------------------------------------------------------------------------------------|------------------|--------------------------|---------------------|---------------------|--------------------------|---------------------|----------------------|----------------------------------------|--------------------|
| 80  | Osterman 2021_Standard F<br>Osterman 2021_Standard Q                                          | Germany          | RDT<br>RDT               | 115<br>165          | 123<br>174          | PCR<br>PCR               | 74<br>91            | 426<br>468           | Nasopharyngeal                         | Adult and children |
| 81  | Parada-Ricart 2021                                                                            | Spain            | RDT                      | 19                  | 40                  | PCR                      | 7                   | 132                  | Nasopharyngeal                         | Age unclear        |
| 82  | Pare 2020                                                                                     | USA              | US                       | 24                  | 31                  | PCR                      | 3                   | 12                   | -                                      | Age unclear        |
| 83  | Pekosz 2021                                                                                   | USA              | RDT                      | 27                  | 30                  | PCR                      | 1                   | 221                  | Nasopharyngeal                         | Adult              |
| 84  | Perez-Garcia 2021_CerTest<br>Perez-Garcia 2021_Panbio                                         | Spain            | RDT<br>RDT               | 91<br>102           | 91<br>102           | PCR<br>PCR               | 79<br>68            | 229<br>218           | Nasopharyngeal                         | Adult              |
| 85  | Pilarowski 2020                                                                               | USA              | RDT                      | 15                  | 15                  | PCR                      | 11                  | 863                  | Nasal                                  | Age unclear        |
| 86  | Pivetta 2021                                                                                  | Italy            | US                       | 101                 | 107                 | PCR                      | 6                   | 121                  | -                                      | Age unclear        |
| 87  | Pollock 2021                                                                                  | USA              | RDT                      | 226                 | 238                 | PCR                      | 66                  | 2070                 | Nasal                                  | Adult and children |
| 88  | Porte 2020                                                                                    | Chile            | RDT                      | 77                  | 77                  | PCR                      | 5                   | 50                   | Nasopharyngeal                         | Adult and children |
| 89  | Prokop 2020                                                                                   | Netherlands      | CT                       | 43                  | 48                  | PCR                      | 10                  | 57                   | -                                      | Adult and children |
| 90  | Ristic 2021                                                                                   | Serbia           | RDT                      | 25                  | 25                  | PCR                      | 18                  | 95                   | Nasopharyngeal                         | Adult and children |
| 91  | Rottenstreich 2021                                                                            | Israel           | RDT                      | 5                   | 5                   | PCR                      | 4                   | 1321                 | Nasopharyngeal                         | Adult              |
| 92  | Salvagno 2021                                                                                 | Italy            | RDT                      | 108                 | 109                 | PCR                      | 41                  | 212                  | Nasopharyngeal                         | Adult              |
| 93  | Sberna 2021                                                                                   | Italy            | RDT                      | 5                   | 5                   | PCR                      | 57                  | 131                  | Saliva                                 | Adult              |
| 94  | Schildgen 2021_Rapigen<br>Schildgen 2021_Panbio<br>Schildgen 2021_Standard Q                  | Germany          | RDT<br>RDT<br>RDT        | 14<br>21<br>37      | 18<br>28<br>62      | PCR<br>PCR<br>PCR        | 28<br>21<br>5       | 55<br>45<br>11       | Bronchoalveolar lavage and throat wash | Age unclear        |
| 95  | Schmid 2020<br>Schmid 2020                                                                    | Germany          | US<br>CT                 | 30<br>7             | 52<br>15            | PCR<br>PCR               | 9<br>9              | 83<br>83             | 3-arm study of CT, US by PCR           | Age unclear        |
| 96  | Schulze-hagen 2020                                                                            | Germany          | CT                       | 65                  | 81                  | PCR                      | 4                   | 110                  | -                                      | Adult              |
| 97  | Scohy 2020                                                                                    | Belgium          | RDT                      | 32                  | 32                  | PCR                      | 74                  | 116                  | Nasopharyngeal                         | Adult and children |
| 98  | Seitz 2021                                                                                    | Austria          | RDT                      | 8                   | 8                   | PCR                      | 10                  | 32                   | Saliva                                 | Adult and children |
| 99  | Shrestha 2020                                                                                 | Nepal            | RDT                      | 40                  | 40                  | PCR                      | 7                   | 73                   | Nasopharyngeal                         | Adult and children |
| 100 | Song 2020                                                                                     | China            | CT                       | 108                 | 163                 | PCR                      | 3                   | 48                   | -                                      | Adult              |
| 101 | Sorlini 2020                                                                                  | Italy            | US                       | 264                 | 298                 | PCR                      | 23                  | 86                   | -                                      | Age unclear        |
| 102 | Steuwe 2020                                                                                   | Germany          | CT                       | 19                  | 38                  | PCR                      | 0                   | 67                   | -                                      | Adult              |
| 103 | Stokes 2021                                                                                   | Canada           | RDT                      | 231                 | 233                 | PCR                      | 37                  | 1408                 | Nasopharyngeal                         | Adult and children |
| 104 | Takeuchi 2021                                                                                 | Japan            | RDT                      | 91                  | 91                  | PCR                      | 14                  | 1095                 | Nasopharyngeal                         | Adult              |
| 105 | Thakur 2021                                                                                   | India            | RDT                      | 29                  | 30                  | PCR                      | 55                  | 647                  | Nasopharyngeal                         | Adult              |
| 106 | Toptan 2020_Berlin<br>Toptan 2020_Frankfurt                                                   | Germany          | RDT<br>RDT               | 45<br>16            | 45<br>16            | PCR<br>PCR               | 13<br>16            | 22<br>54             | Nasopharyngeal                         | Age unclear        |
| 107 | Torres 2021_symptomatic<br>Torres 2021_asymptomatic                                           | Spain            | RDT<br>RDT               | 73<br>15            | 73<br>15            | PCR<br>PCR               | 18<br>10            | 105<br>77            | Nasopharyngeal                         | Adult and children |
| 108 | Torres 2021                                                                                   | Spain            | RDT                      | 38                  | 38                  | PCR                      | 41                  | 596                  | Nasopharyngeal                         | Adult and children |
| 109 | Tung 2021                                                                                     | Spain            | US                       | 39                  | 51                  | PCR                      | 15                  | 38                   | -                                      | Adult              |
| 110 | Turcato 2021                                                                                  | Italy            | RDT                      | 179                 | 209                 | PCR                      | 44                  | 3201                 | Nasopharyngeal                         | Age unclear        |
| 111 | Veyrenche 2021                                                                                | France           | RDT                      | 13                  | 13                  | PCR                      | 32                  | 52                   | Nasopharyngeal                         | Adult              |
| 112 | Villaverde 2021                                                                               | Spain            | RDT                      | 35                  | 38                  | PCR                      | 42                  | 1582                 | Nasopharyngeal                         | Children           |
| 113 | Volpicel 2021                                                                                 | EU multinational | US                       | 921                 | 1130                | PCR                      | 101                 | 332                  | -                                      | Adult and children |
| 114 | Wang 2020                                                                                     | China            | CT                       | 28                  | 61                  | PCR                      | 1                   | 129                  | -                                      | Adult and children |
| 115 | Weitzel 2020_Rapigen<br>Weitzel 2020_LimingBio<br>Weitzel 2020_Savant<br>Weitzel 2020_Bioeasy | Chile            | RDT<br>RDT<br>RDT<br>RDT | 49<br>0<br>13<br>68 | 49<br>1<br>13<br>68 | PCR<br>PCR<br>PCR<br>PCR | 30<br>9<br>65<br>12 | 60<br>18<br>96<br>43 | Nasopharyngeal                         | Adult              |
| 116 | Xiong 2020                                                                                    | China            | CT                       | 19                  | 27                  | PCR                      | 1                   | 20                   | -                                      | Adult and children |
| 117 | Young, B.C 2021                                                                               | UK               | RDT                      | 133                 | 133                 | PCR                      | 81                  | 653                  | Nasopharyngeal                         | Adult              |
| 118 | Young, S 2020                                                                                 | USA              | RDT                      | 29                  | 30                  | PCR                      | 9                   | 221                  | Nasopharyngeal                         | Adult              |

Figure S1. Quality Assessment of Diagnostic Accuracy Studies 2 (QUADAS-2) Study Quality Summary

|                     | 1.RoB_Patient Selection | 2.RoB_Index Test | 3.RoB_Reference Standard | 4.RoB_Flow & Timing | 5.Applicability_Patient Selection | 6.Applicability_Index Test | 7.Applicability_Reference Standard |
|---------------------|-------------------------|------------------|--------------------------|---------------------|-----------------------------------|----------------------------|------------------------------------|
| Agullo 2021         | +                       | ?                | ?                        | ?                   | +                                 | +                          | +                                  |
| Ai 2020             | ?                       | -                | ?                        | +                   | +                                 | +                          | +                                  |
| Albert 2021         | ?                       | +                | ?                        | +                   | +                                 | +                          | +                                  |
| Alemanya 2020       | ?                       | ?                | +                        | +                   | +                                 | -                          | +                                  |
| Asai 2021           | ?                       | ?                | ?                        | +                   | +                                 | +                          | +                                  |
| Aslan 2020          | ?                       | ?                | +                        | +                   | +                                 | ?                          | +                                  |
| Barbosa 2020        | +                       | ?                | +                        | +                   | +                                 | +                          | +                                  |
| Baro 2021           | ?                       | ?                | +                        | +                   | +                                 | -                          | +                                  |
| Basso 2021          | ?                       | ?                | ?                        | +                   | +                                 | +                          | +                                  |
| Beck 2021           | ?                       | +                | +                        | +                   | +                                 | +                          | +                                  |
| Bellini 2020        | +                       | +                | +                        | ?                   | +                                 | +                          | +                                  |
| Berger 2021         | +                       | +                | +                        | +                   | +                                 | +                          | +                                  |
| Besutti 2020        | +                       | +                | ?                        | +                   | +                                 | +                          | +                                  |
| Bianchi 2021        | -                       | +                | +                        | +                   | -                                 | +                          | +                                  |
| Bosso 2020          | -                       | +                | +                        | +                   | -                                 | +                          | +                                  |
| Mboumba 2021        | -                       | ?                | +                        | +                   | +                                 | -                          | +                                  |
| Brenner 2021        | -                       | ?                | +                        | +                   | -                                 | +                          | +                                  |
| Cartocci 2020       | ?                       | +                | ?                        | +                   | +                                 | +                          | +                                  |
| Caruana 2021        | +                       | +                | ?                        | ?                   | +                                 | -                          | +                                  |
| Caruso 2020         | ?                       | ?                | ?                        | +                   | +                                 | +                          | +                                  |
| Cerutti 2020        | ?                       | ?                | ?                        | ?                   | +                                 | -                          | +                                  |
| Chaimayo 2020       | ?                       | ?                | ?                        | +                   | +                                 | -                          | +                                  |
| Ciotti 2021         | ?                       | ?                | ?                        | +                   | +                                 | ?                          | +                                  |
| Colombi 2020        | -                       | +                | +                        | +                   | -                                 | ?                          | +                                  |
| Debray 2020         | +                       | +                | ?                        | ?                   | +                                 | +                          | +                                  |
| Dofferhoff 2020     | ?                       | -                | -                        | ?                   | +                                 | +                          | +                                  |
| Dominguez 2021      | -                       | ?                | ?                        | ?                   | +                                 | ?                          | +                                  |
| Drain 2021          | ?                       | ?                | ?                        | +                   | +                                 | +                          | +                                  |
| Ducray 2020         | +                       | -                | ?                        | ?                   | +                                 | +                          | +                                  |
| Falaschi 2020       | ?                       | +                | ?                        | +                   | +                                 | +                          | +                                  |
| Favresse 2021       | ?                       | +                | ?                        | +                   | +                                 | -                          | +                                  |
| Fenollar 2021       | ?                       | ?                | ?                        | +                   | +                                 | +                          | +                                  |
| Ferguson 2021       | -                       | +                | ?                        | ?                   | +                                 | +                          | +                                  |
| Fonsi 2020          | +                       | ?                | ?                        | +                   | +                                 | +                          | +                                  |
| Fujioka 2020        | ?                       | +                | ?                        | ?                   | +                                 | +                          | +                                  |
| Gezer 2020          | +                       | ?                | ?                        | +                   | +                                 | +                          | +                                  |
| Giannitto 2020      | -                       | ?                | +                        | +                   | +                                 | +                          | +                                  |
| Gietema 2020        | +                       | +                | -                        | +                   | +                                 | +                          | +                                  |
| Gili 2021           | -                       | ?                | +                        | +                   | +                                 | -                          | +                                  |
| Gremmels 2020       | +                       | +                | +                        | +                   | +                                 | +                          | +                                  |
| Guillo 2020         | -                       | +                | -                        | +                   | +                                 | +                          | +                                  |
| Gupta 2020          | +                       | +                | ?                        | +                   | +                                 | +                          | +                                  |
| Haak 2020           | -                       | +                | +                        | +                   | -                                 | +                          | +                                  |
| He 2020             | ?                       | +                | ?                        | +                   | +                                 | +                          | +                                  |
| Hermans 2020        | +                       | ?                | -                        | +                   | +                                 | +                          | +                                  |
| Hemigou 2020        | -                       | ?                | +                        | +                   | -                                 | +                          | +                                  |
| Herpe 2021          | ?                       | +                | -                        | +                   | +                                 | +                          | +                                  |
| Hirotsu 2021        | ?                       | +                | ?                        | +                   | +                                 | -                          | +                                  |
| Homza 2021          | ?                       | +                | ?                        | +                   | +                                 | +                          | +                                  |
| Houston 2021        | ?                       | +                | ?                        | ?                   | +                                 | +                          | +                                  |
| Igloi 2021          | +                       | +                | ?                        | +                   | +                                 | +                          | +                                  |
| Jaaskelainen 2021   | -                       | ?                | +                        | ?                   | +                                 | -                          | +                                  |
| Jalil et al2020     | -                       | +                | +                        | +                   | -                                 | ?                          | +                                  |
| James 2021          | +                       | +                | ?                        | +                   | +                                 | +                          | +                                  |
| Kannian 2021        | -                       | ?                | +                        | ?                   | ?                                 | -                          | +                                  |
| Kilic 2021          | ?                       | +                | ?                        | +                   | +                                 | +                          | +                                  |
| Kohmer 2021         | ?                       | ?                | ?                        | +                   | +                                 | -                          | +                                  |
| Korevaar 2020       | +                       | +                | -                        | +                   | +                                 | +                          | +                                  |
| Krdzalic 2020       | -                       | ?                | +                        | +                   | +                                 | +                          | +                                  |
| Kruttgen 2021       | -                       | ?                | +                        | +                   | +                                 | -                          | +                                  |
| Kuzan 2020          | +                       | +                | +                        | +                   | +                                 | +                          | +                                  |
| Lambert-Niclot 2020 | ?                       | ?                | ?                        | ?                   | ?                                 | -                          | +                                  |
| Lefever 2021        | ?                       | ?                | +                        | +                   | +                                 | -                          | +                                  |
| Li 2020             | -                       | +                | ?                        | ?                   | +                                 | +                          | +                                  |
| Lievelde 2020       | -                       | -                | +                        | +                   | -                                 | ?                          | +                                  |
| Linares 2020        | ?                       | ?                | ?                        | ?                   | +                                 | ?                          | +                                  |
| Lindner 2021        | +                       | +                | +                        | +                   | +                                 | -                          | +                                  |
| Liotti 2021         | ?                       | ?                | ?                        | ?                   | +                                 | -                          | +                                  |
| Luo 2020a           | ?                       | -                | +                        | +                   | +                                 | +                          | +                                  |
| Luo 2020b           | -                       | ?                | ?                        | ?                   | +                                 | +                          | +                                  |
| Mei 2020            | +                       | ?                | +                        | ?                   | +                                 | +                          | +                                  |
| Merino 2021         | ?                       | +                | ?                        | ?                   | +                                 | +                          | +                                  |
| Mertens 2020        | ?                       | ?                | ?                        | ?                   | +                                 | -                          | +                                  |
| Miranda 2020        | +                       | +                | ?                        | +                   | +                                 | +                          | +                                  |
| Mockel 2021         | ?                       | +                | +                        | ?                   | +                                 | +                          | +                                  |
| Nalumansi 2020      | ?                       | ?                | ?                        | +                   | ?                                 | +                          | +                                  |
| Narinx 2020         | +                       | +                | ?                        | +                   | +                                 | +                          | +                                  |
| Okoye 2021          | -                       | +                | ?                        | +                   | +                                 | +                          | +                                  |
| Olearo 2020         | ?                       | ?                | ?                        | +                   | +                                 | -                          | +                                  |
| Osterman 2021       | ?                       | ?                | ?                        | ?                   | -                                 | +                          | +                                  |
| Parada-Ricart 2021  | -                       | ?                | ?                        | ?                   | +                                 | +                          | +                                  |
| Pare 2020           | -                       | ?                | ?                        | -                   | +                                 | +                          | +                                  |
| Pekosz 2021         | -                       | ?                | +                        | +                   | ?                                 | -                          | +                                  |
| Perez-Garcia 2021   | -                       | ?                | +                        | ?                   | +                                 | -                          | +                                  |
| Pilarowski 2020     | ?                       | +                | ?                        | +                   | +                                 | +                          | +                                  |
| Pivetta 2021        | -                       | +                | +                        | +                   | -                                 | +                          | +                                  |
| Pollock 2021        | +                       | +                | ?                        | +                   | +                                 | +                          | +                                  |
| Porte 2020          | -                       | +                | +                        | +                   | ?                                 | -                          | +                                  |
| Prokop 2020         | -                       | +                | -                        | ?                   | +                                 | +                          | +                                  |
| Ristic 2021         | ?                       | +                | ?                        | +                   | +                                 | ?                          | +                                  |
| Rottenstreich 2021  | ?                       | ?                | ?                        | +                   | +                                 | ?                          | +                                  |
| Salvagno 2021       | +                       | ?                | ?                        | +                   | +                                 | -                          | +                                  |
| Sberna 2021         | +                       | ?                | ?                        | +                   | ?                                 | ?                          | +                                  |
| Schildgen 2021      | -                       | ?                | +                        | +                   | ?                                 | -                          | +                                  |
| Schmid 2020         | ?                       | ?                | ?                        | +                   | ?                                 | -                          | +                                  |
| Schulze-hagen 2020  | ?                       | +                | ?                        | +                   | +                                 | +                          | +                                  |
| Schoy 2020          | ?                       | ?                | ?                        | +                   | ?                                 | -                          | +                                  |
| Seitz 2021          | ?                       | +                | ?                        | ?                   | -                                 | +                          | +                                  |
| Shrestha 2020       | ?                       | +                | ?                        | ?                   | +                                 | +                          | +                                  |
| Song 2020           | +                       | +                | +                        | +                   | +                                 | +                          | +                                  |
| Sorlini 2020        | -                       | +                | +                        | +                   | -                                 | +                          | +                                  |
| Steuwe 2020         | ?                       | +                | -                        | ?                   | +                                 | +                          | +                                  |
| Stokes 2021         | ?                       | +                | ?                        | ?                   | +                                 | +                          | +                                  |
| Takeuchi 2021       | ?                       | +                | ?                        | +                   | +                                 | +                          | +                                  |
| Thakur 2021         | ?                       | +                | ?                        | +                   | +                                 | +                          | +                                  |

|                 |   |   |   |   |   |   |   |
|-----------------|---|---|---|---|---|---|---|
| Thakur 2021     | ? | + | ? | + | + | + | + |
| Toptan 2020     | ? | ? | ? | + | ? | - | + |
| Torres 2021     | ? | + | ? | + | + | + | + |
| Torres 2021     | ? | + | ? | + | + | + | + |
| Tung 2021       | - | + | + | + | - | + | + |
| Turcato 2021    | ? | ? | ? | ? | + | ? | + |
| Veyrenche 2021  | - | ? | + | + | + | - | + |
| Villaverde 2021 | - | + | ? | ? | + | + | + |
| Volpicel 2021   | - | + | + | + | - | + | + |
| Wang 2020       | - | ? | + | ? | + | + | + |
| Weitzel 2020    | - | ? | + | + | ? | - | + |
| Xiong 2020      | + | ? | ? | - | + | + | + |
| Young, B.C 2021 | ? | ? | ? | + | + | ? | + |
| Young, S 2020   | ? | + | ? | + | + | - | + |

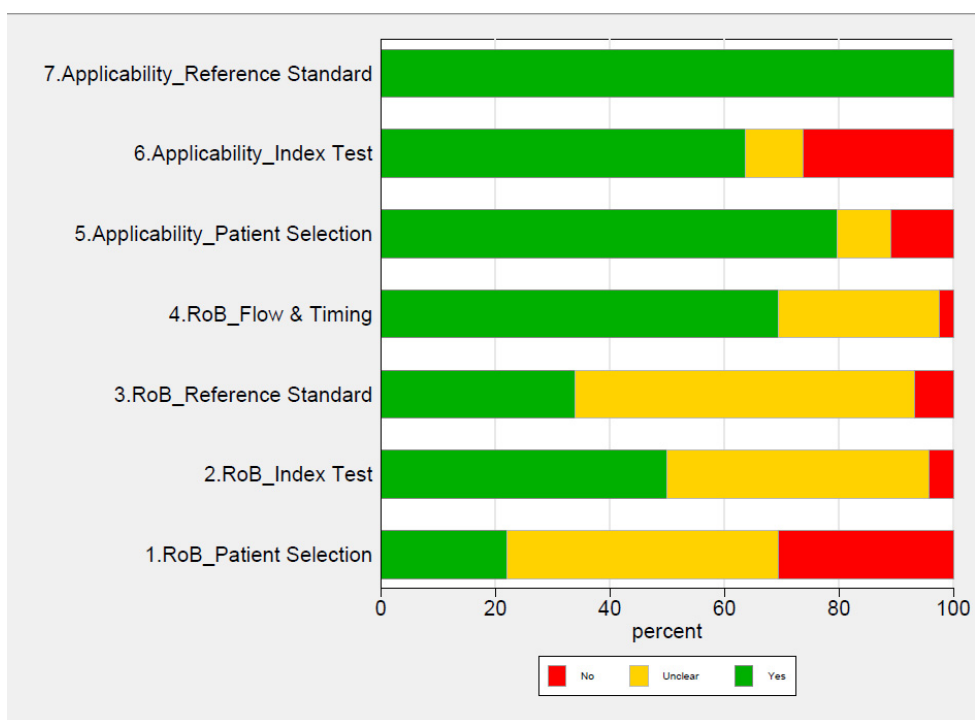

**Figure S2. Network meta-analysis forest plot and SROC between nasopharyngeal swab and other swab for RDT**

**A. Network meta-analysis of nasopharyngeal swab**

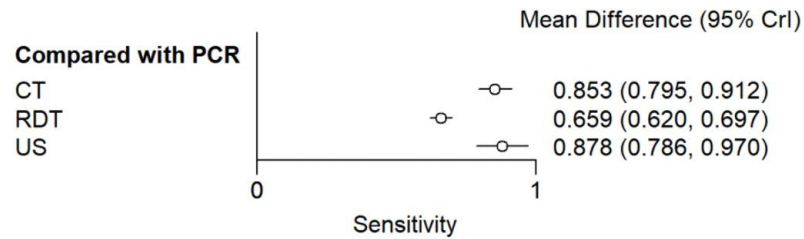

**B. Network meta-analysis of nasal, saliva, or throat swab**

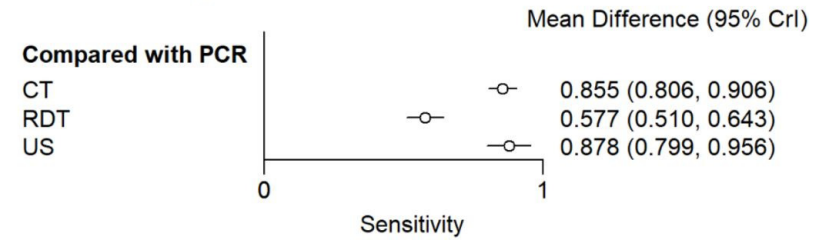

**C. Pairwise meta-analysis SROC of nasopharyngeal swab**

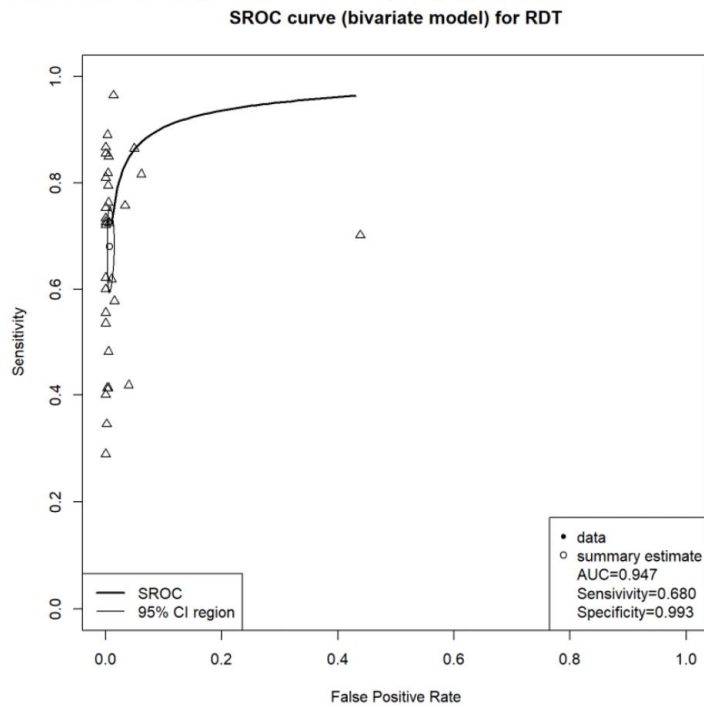

**D. Pairwise meta-analysis SROC of nasal, saliva, or throat swab**

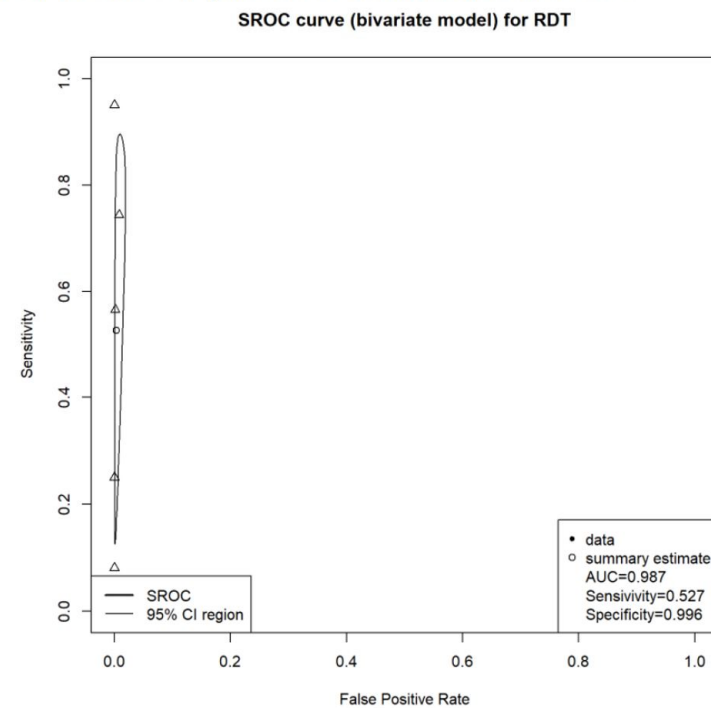

**Table S2. Search queries**

**PubMed and Cochrane Library**

1. Disease

("SARS-CoV-2"[Mesh] OR "COVID-19"[Mesh] OR "SARS-CoV-2 variants"  
[Supplementary Concept] OR "COVID-19 breakthrough infections" [Supplementary  
Concept] OR "COVID-19"[tiab] OR "COVID 19"[tiab] OR "COVID19"[tiab])

2. Index tests and reference standard

("COVID-19 testing"[MeSH terms] OR "COVID 19 Test\*"[tiab]) AND ("rapid test\*"[tiab]  
OR "quick test\*"[tiab] OR "antigen test\*"[tiab] OR "STANDARD Q"[tiab] OR  
"PANBIO"[tiab] OR "point-of-care"[tiab] OR "Reverse Transcriptase Polymerase Chain  
Reaction"[Mesh] OR "RT-PCR"[tiab] OR "Tomography, X-Ray Computed"[Mesh] OR  
"Computed tomography"[tiab] OR "Ultrasonography"[Mesh] OR "Ultrasonography"[tiab])

**Embase**

1. Disease

('severe acute respiratory syndrome coronavirus 2'/exp OR 'coronavirus disease 2019'/exp  
OR 'covid-19':ti,ab OR 'covid 19':ti,ab OR 'covid19':ti,ab)

2. Index tests and reference standard

('covid-19 testing'/exp OR 'covid 19 test\*':ti,ab) AND ('rapid test\*':ti,ab OR 'quick  
test\*':ti,ab OR 'antigen test\*':ti,ab OR 'standard q':ti,ab OR 'panbio':ti,ab OR 'point-of-  
care':ti,ab OR 'reverse transcription polymerase chain reaction'/exp OR 'rt-pcr':ti,ab OR 'x-  
ray computed tomography'/exp OR 'computed tomography':ti,ab OR 'echography'/exp OR  
'ultrasonography':ti,ab)



**Table S3. SUCRA Values of 3 Different methods for diagnosis of SARS-CoV-2 infection by PCR**

| Diagnosis | SUCRA values |             |       |       |          |
|-----------|--------------|-------------|-------|-------|----------|
|           | Sensitivity  | Specificity | PPV   | NPV   | Accuracy |
| US        | 0.893        | 0.334       | 0.461 | 0.674 | 0.385    |
| CT        | 0.774        | 0.666       | 0.539 | 0.891 | 0.657    |
| RDT       | 0.333        | 1.000       | 1.000 | 0.434 | 0.957    |

Abbreviations: RDT, rapid antigen detection tests; CT, computed tomography; US, ultrasonography, PPV, positive predictive value; NPV, negative predictive value.
